# Supplementary material
Source: bioRxiv or medRxiv preprint supplement (https://www.biorxiv.org/highwire/filestream/90555/field_highwire_adjunct_files/0/294306-1.pdf)
Supplement: Supplementary file [file 294306-1.pdf]

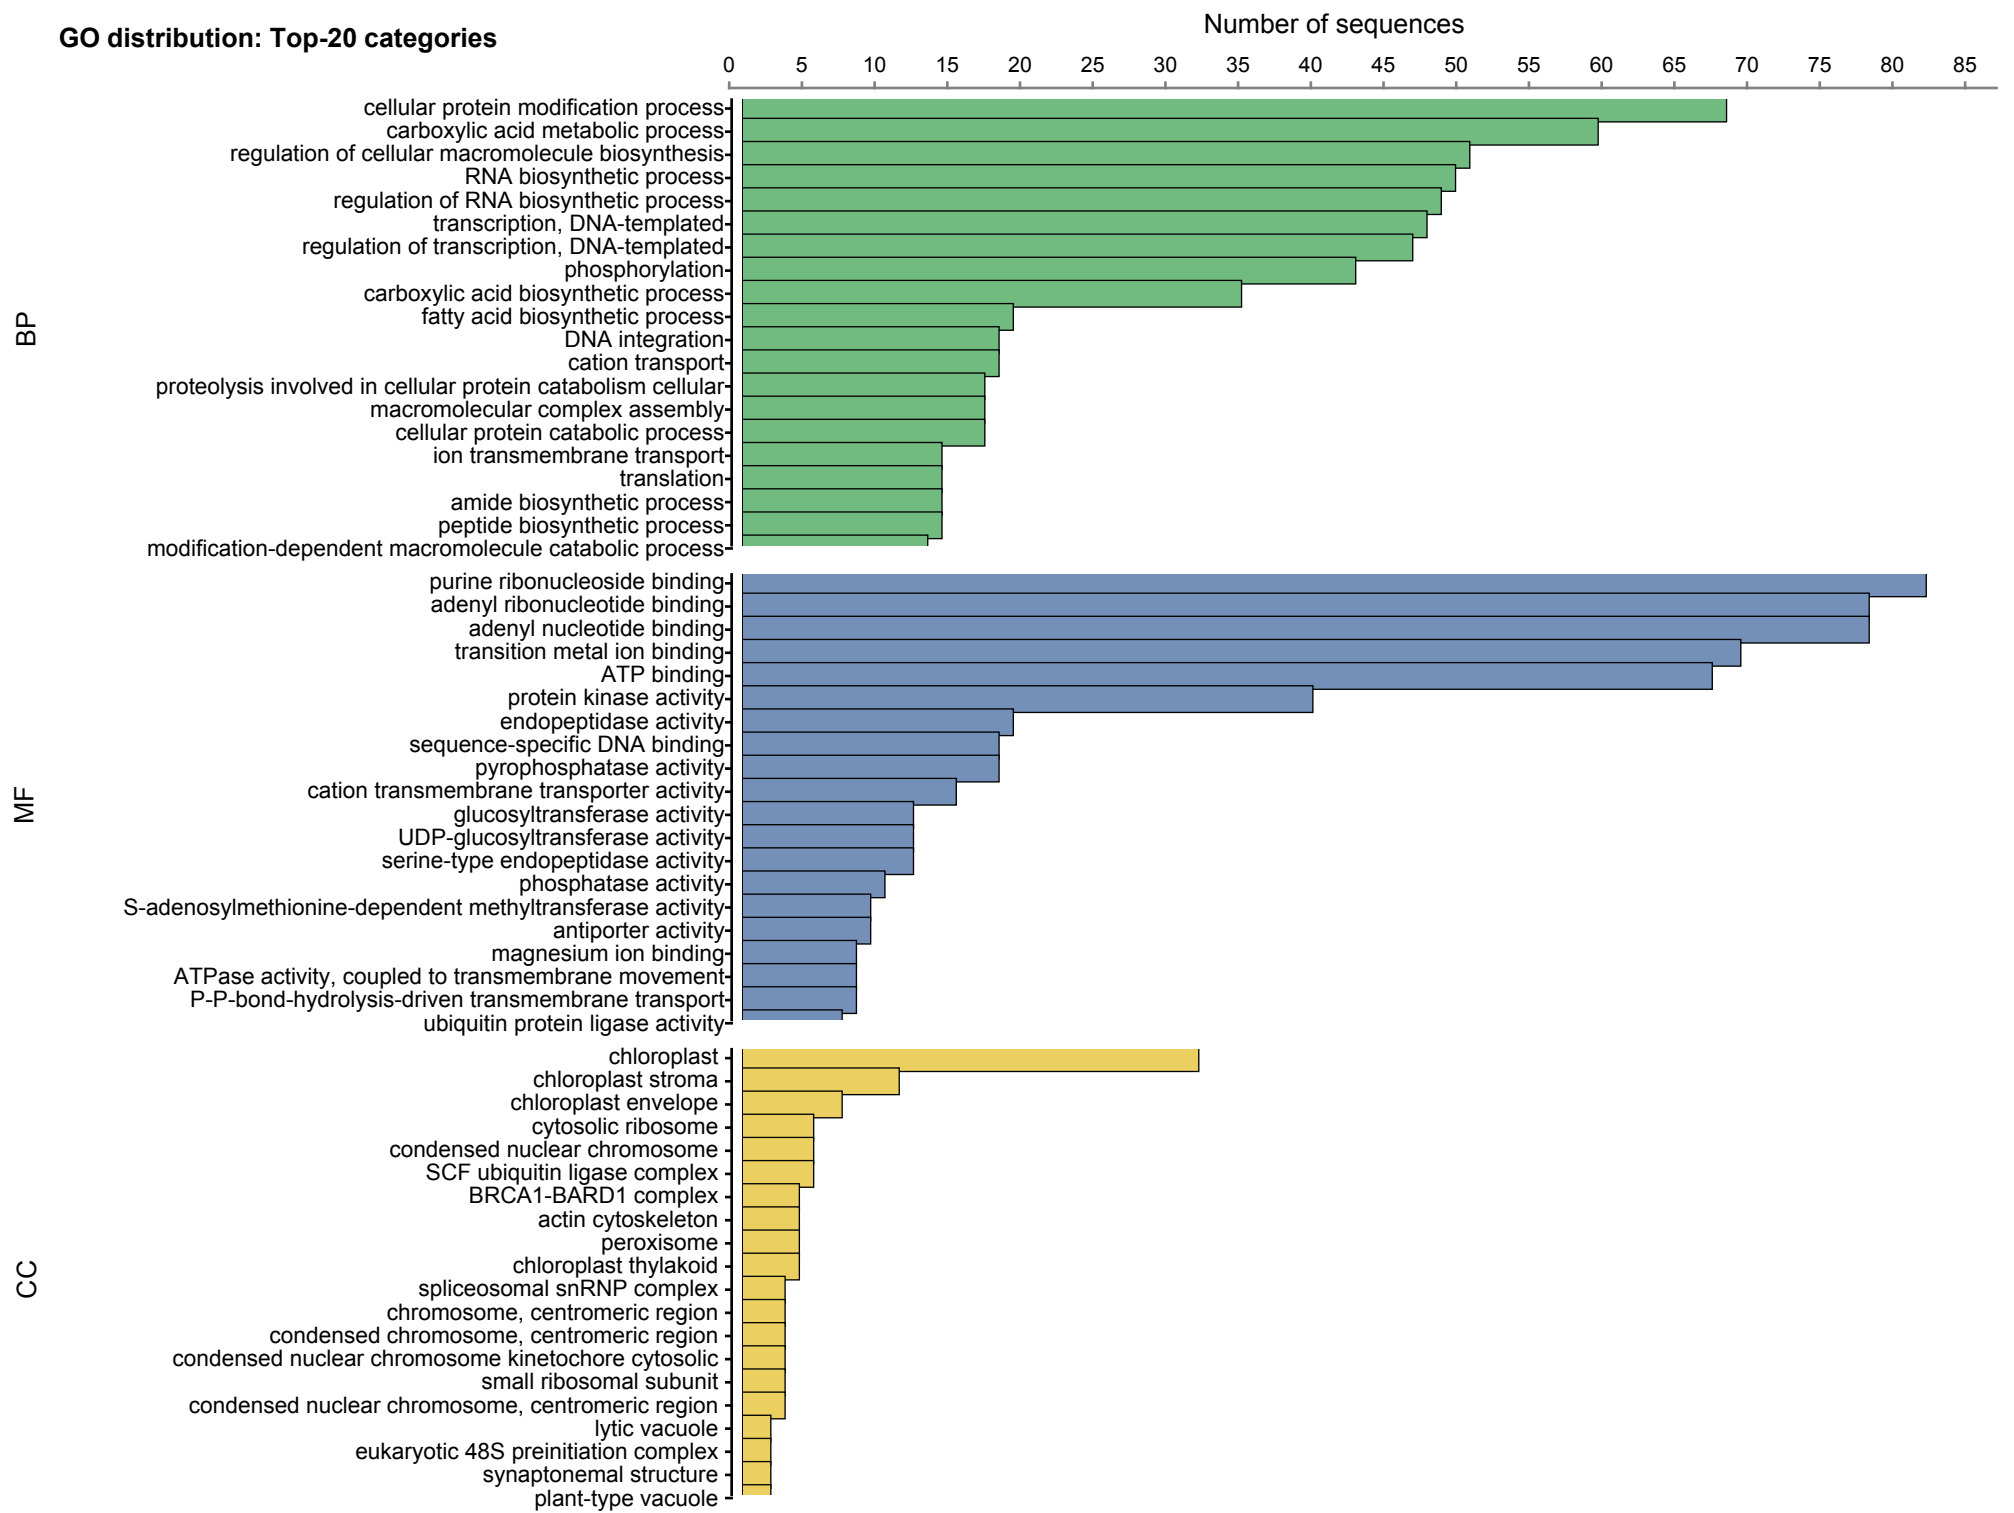

**Supplemental Figure 1. Distribution of gene ontology (GO) terms associated with the 1087 common DEGs.** Only top-20 most abundant categories are shown here. Abbreviations: BP= biological process; MF= molecular function; CC= cellular component.

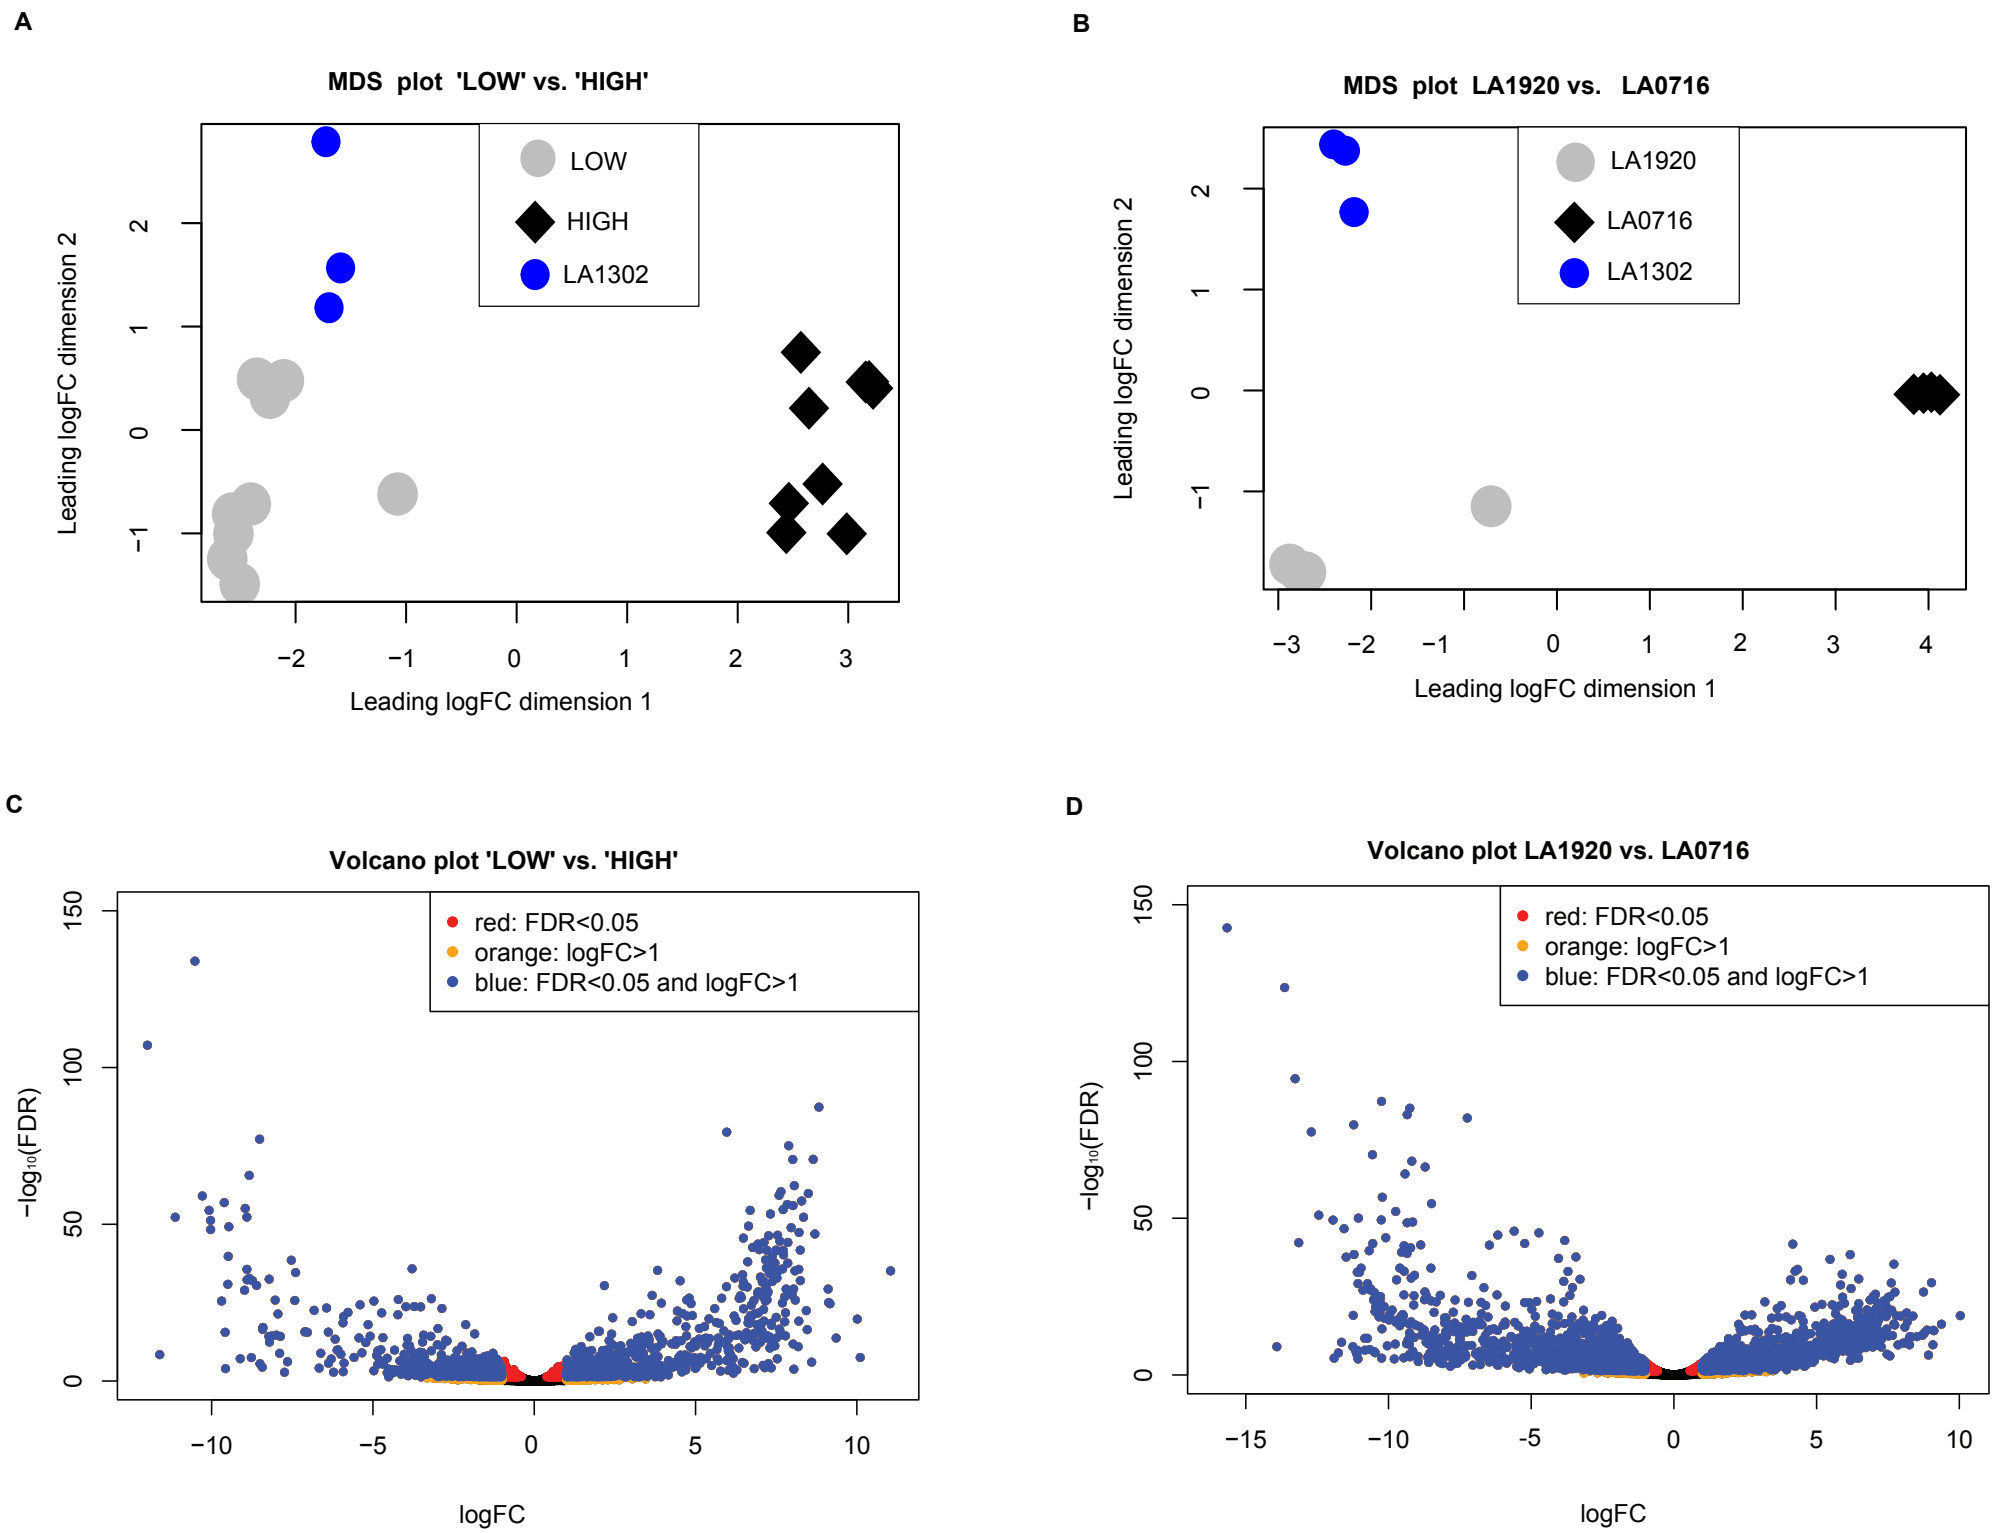

**Supplemental Figure 2. Differential gene expression analyses between low- and high-acylsugar-producing accessions.**

(A) and (B) Multi-dimensional scaling (MDS) plots showing 'LOW' vs. 'HIGH' comparison and LA1920 vs. LA0716 comparison, respectively. Three biological replicates of LA1302 were also included to show their gene expression profiles relative to low- and high-acylsugar-producing accessions. Distances were determined by edgeR (Robinson et al., 2010) based on expression profiles of top-500 genes differing in fold changes.

(C) and (D) Volcano plots showing 'LOW' vs. 'HIGH' comparison and LA1920 vs. LA0716 comparison, respectively. Positive logFC values indicate higher expression levels in high-acylsugar-producing accessions.

Abbreviations: FDR= false discovery rate; logFC= log<sub>2</sub>(fold-change).

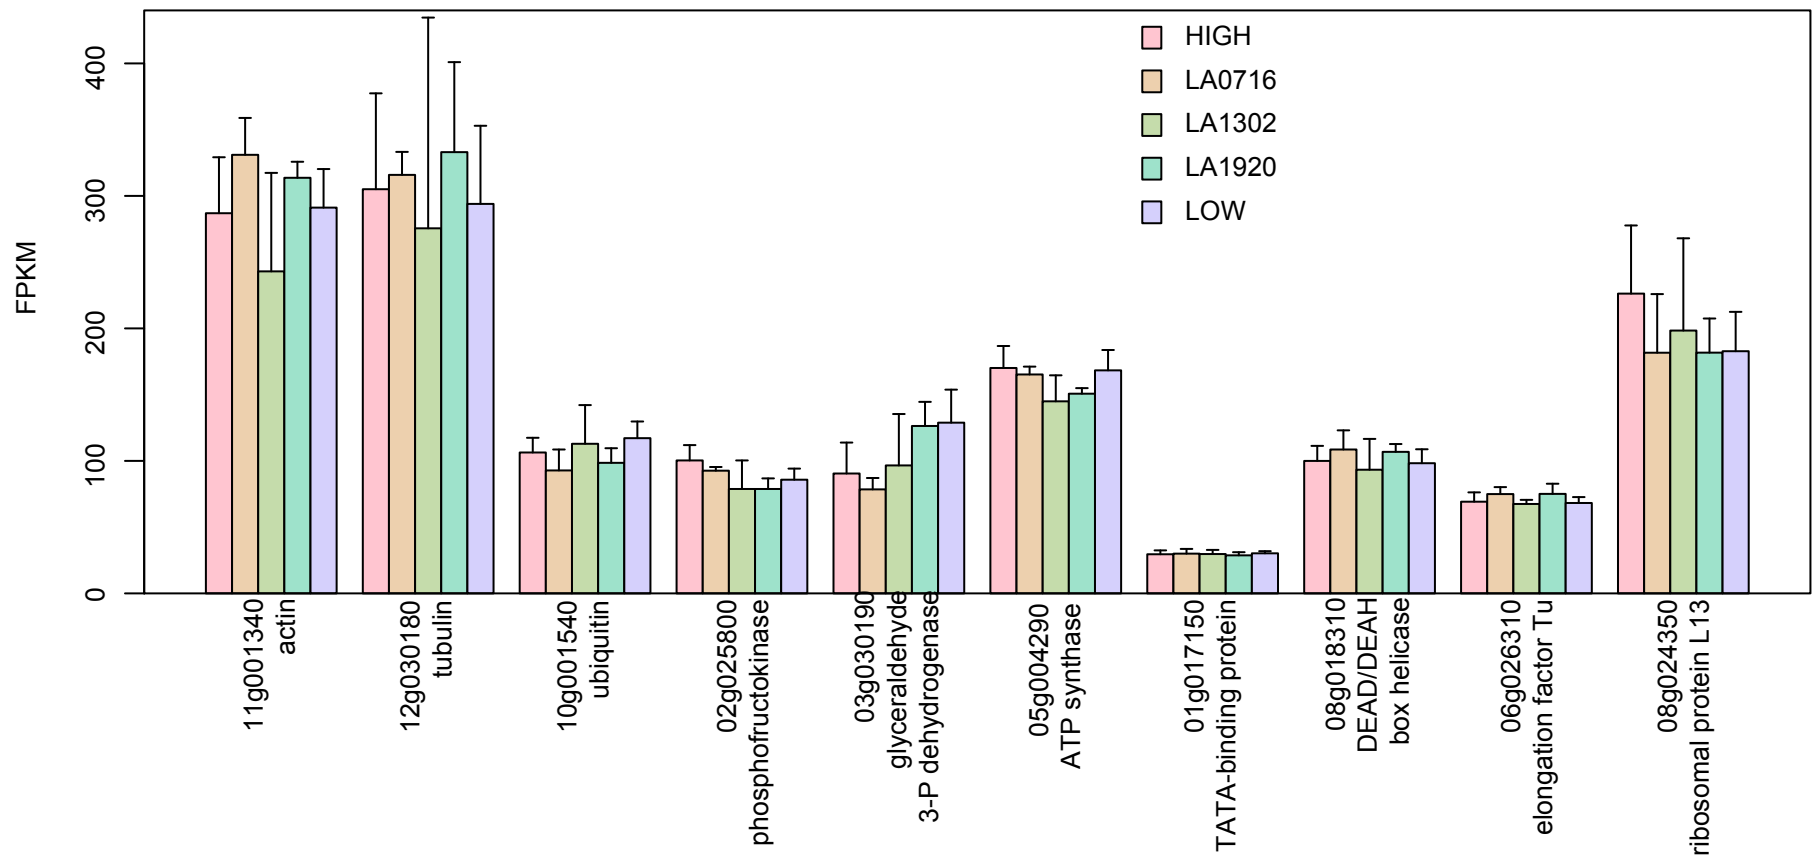

**Supplemental Figure 3. Expression levels of ten selected ‘housekeeping genes’ in different biological groups.**

Genes are designated by their gene identifier numbers (Sopen IDs). Error bars represent 95% confidence interval (only upper limits are shown).

Abbreviation: FPKM= fragments per kilobase of transcript per million mapped reads.

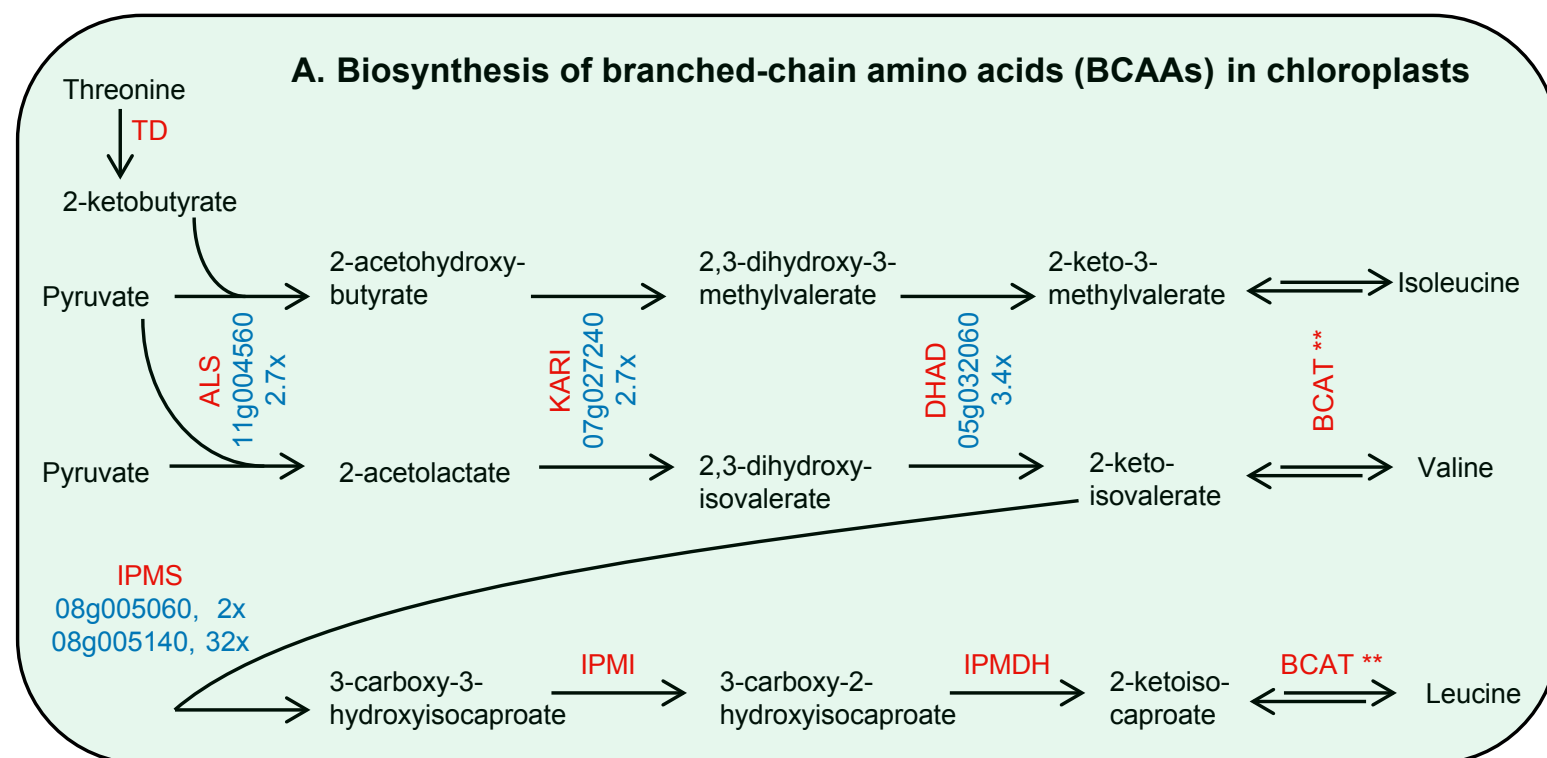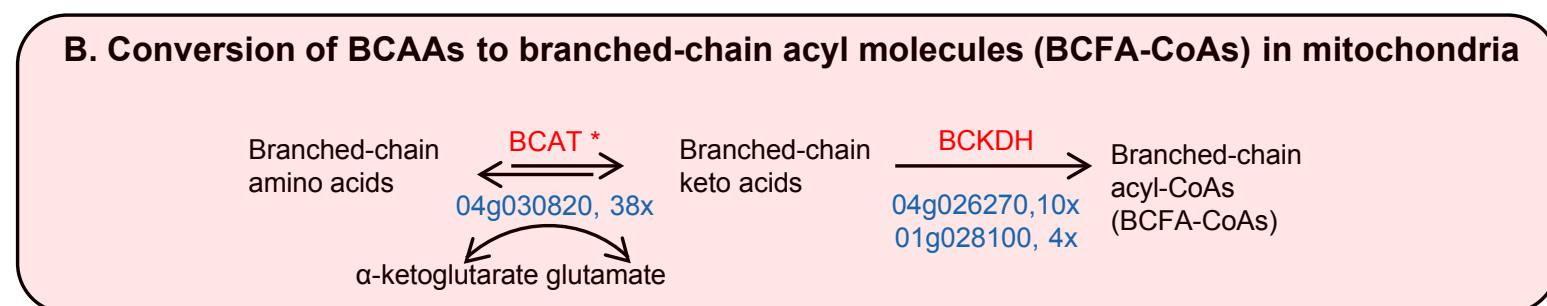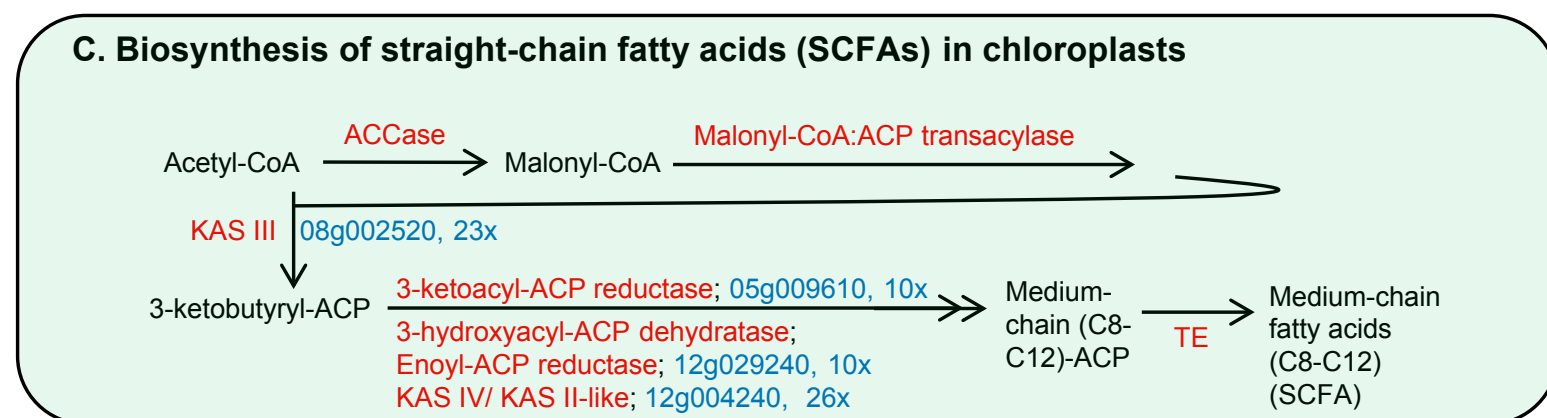

**Supplemental Figure 4. Biosynthesis of branched-chain (A and B) and straight-chain (C) acyl molecules.** Enzymes are highlighted in red. Gene identifiers of differentially expressed genes (DEGs) and their fold-changes are highlighted in blue. 10x indicates 10-fold higher expression in the 'HIGH' group relative to the 'LOW' group. Significance levels associated with fold-changes of DEGs are given in Table 1. Conversion of BCAAs to branched-chain acyl molecules is initiated by a transamination reaction, which is reversibly catalyzed by branched-chain aminotransferase (BCAT; marked with an asterisk) enzymes in mitochondria. On the other hand, chloroplast BCATs (marked with double asterisk) catalyze the last step in the biosynthesis of all three BCAAs (Binder, 2010). Subcellular localization studies using GFP and complementation studies with *Escherichia coli* auxotrophic cells showed that mitochondrial BCAT-1 and BCAT-2 are involved primarily in the conversion of BCAAs to BCFA-CoAs, whereas chloroplast BCAT-3 and BCAT-4 function primarily in BCAA biosynthesis in *Solanum lycopersicum* (Maloney et al., 2010). *Sopen04g030820* was annotated as BCAT isoform-2, suggesting its role in BCFA production in mitochondria, rather than in BCAA biosynthesis in chloroplasts. Abbreviations: TD= threonine dehydratase; ALS= acetolactate synthase; KARI= ketol-acid reductoisomerase; DHAD= dihydroxy-acid dehydratase; IPMS= isopropylmalate synthase; IPMI= isopropylmalate isomerase; IPMDH= isopropylmalate dehydrogenase; BCAT= branched-chain aminotransferase; BCKDH= branched-chain keto acid dehydrogenase; ACCase= acetyl-CoA carboxylase; KAS= beta-ketoacyl-ACP synthase; TE= thioesterase; ACP= acyl carrier protein.

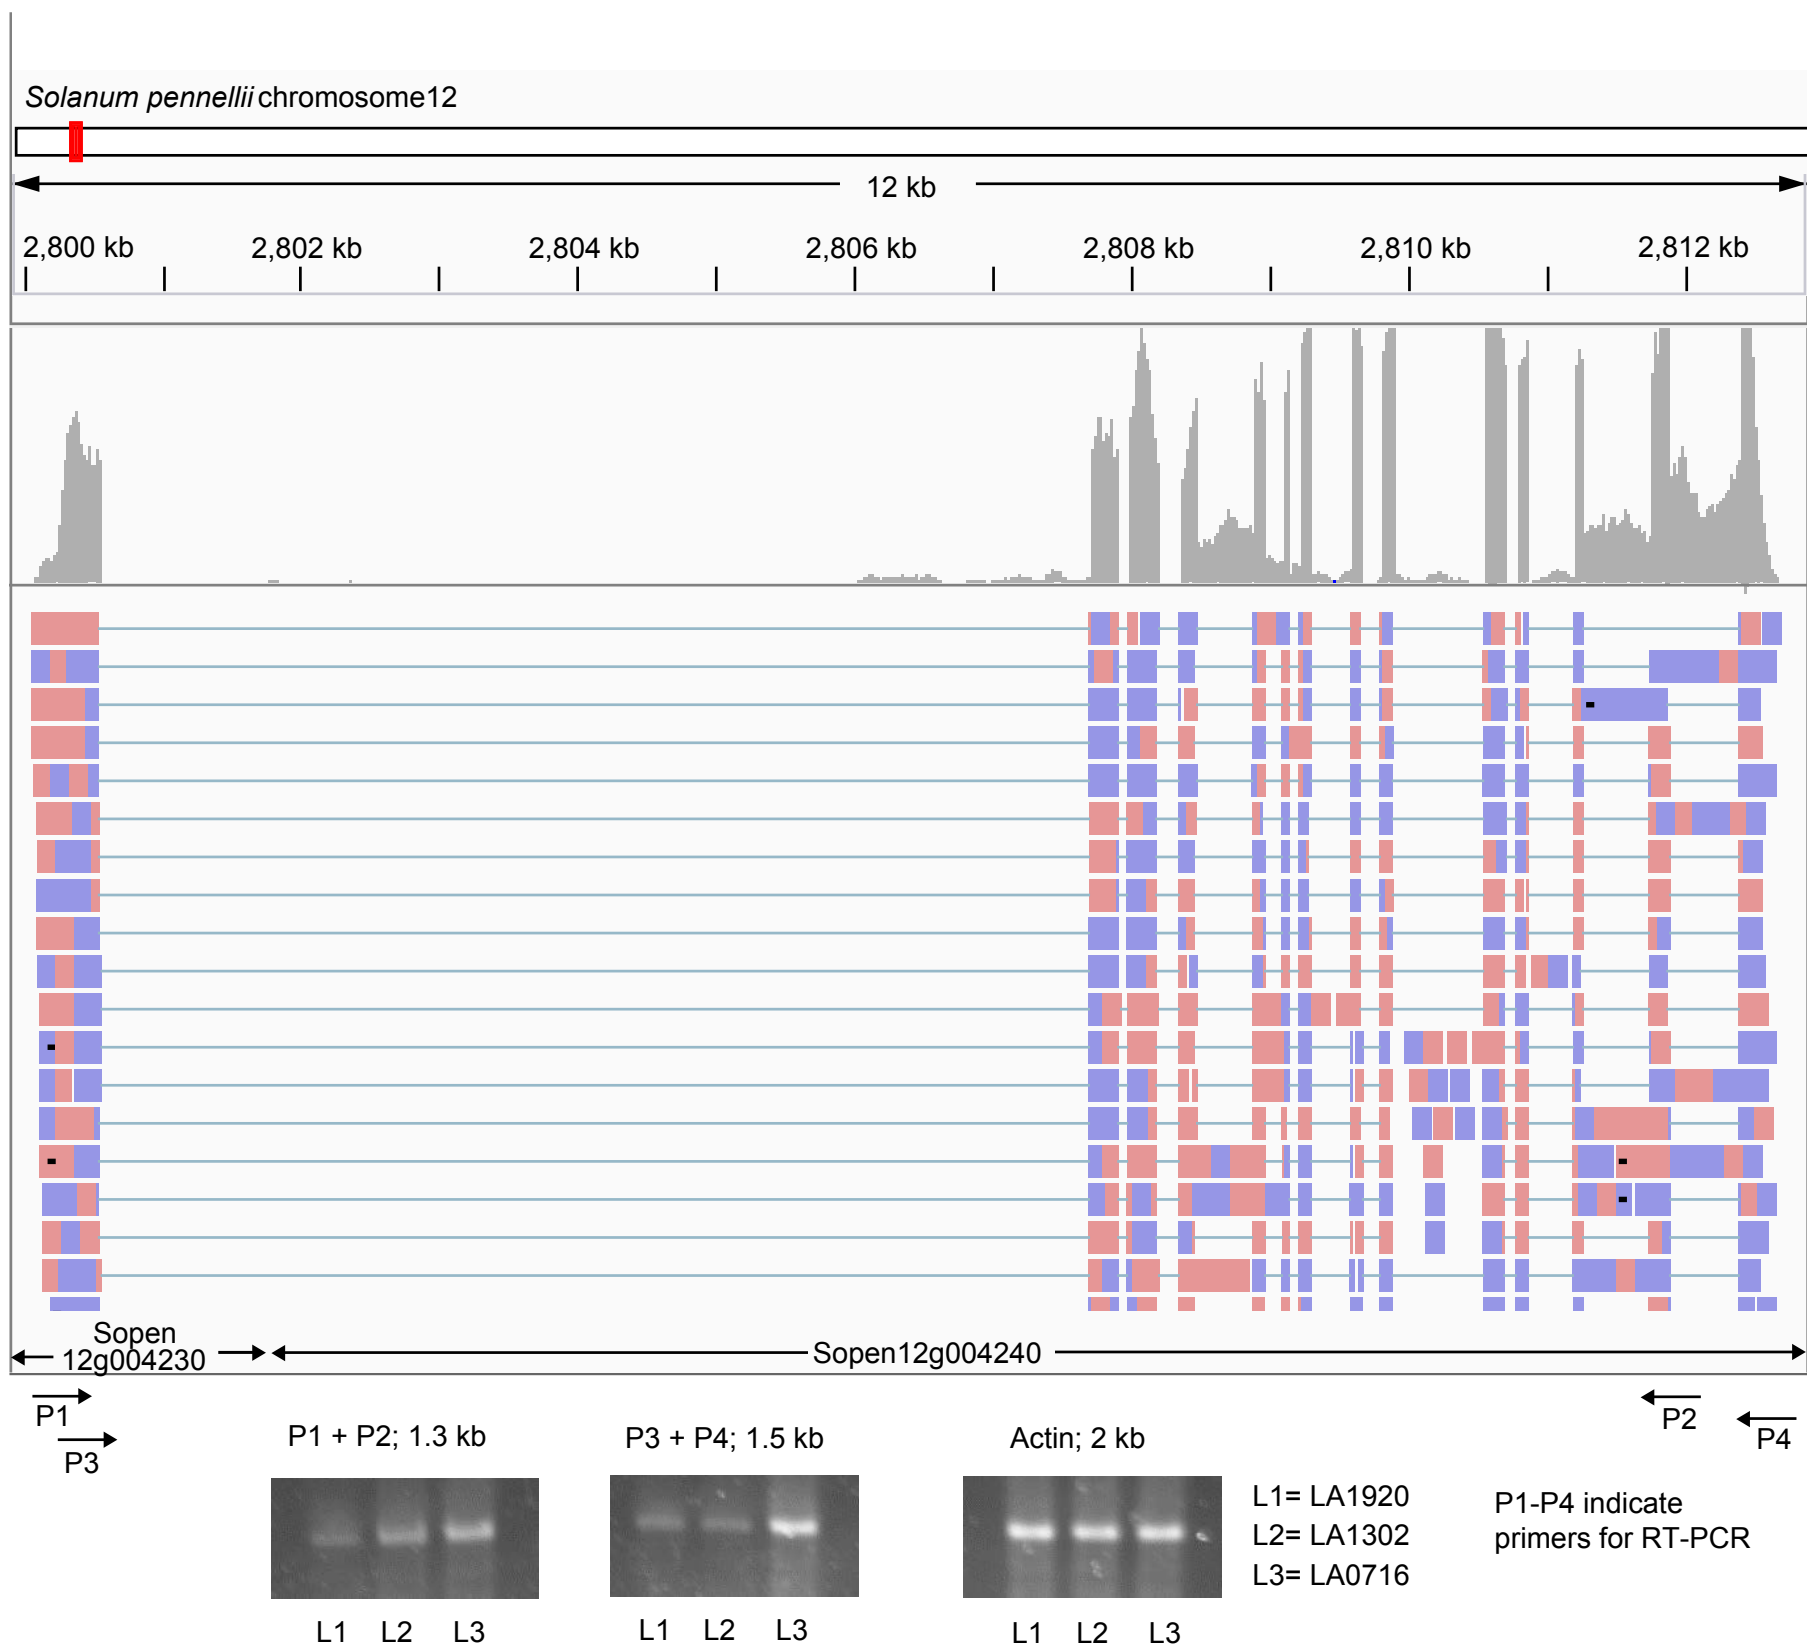

**Supplemental Figure 5. Single transcript produced by the locus containing Sopen12g004230-Sopen12g004240.** Integrated Genome Viewer (Thorvaldsdottir et al., 2013) was used to visualize RNA-Seq reads mapped to *S. pennellii* chromosome 12 locus containing *Sopen12g004230-Sopen12g004240*. Arrows labeled P1-P4 indicate primers for RT-PCR.

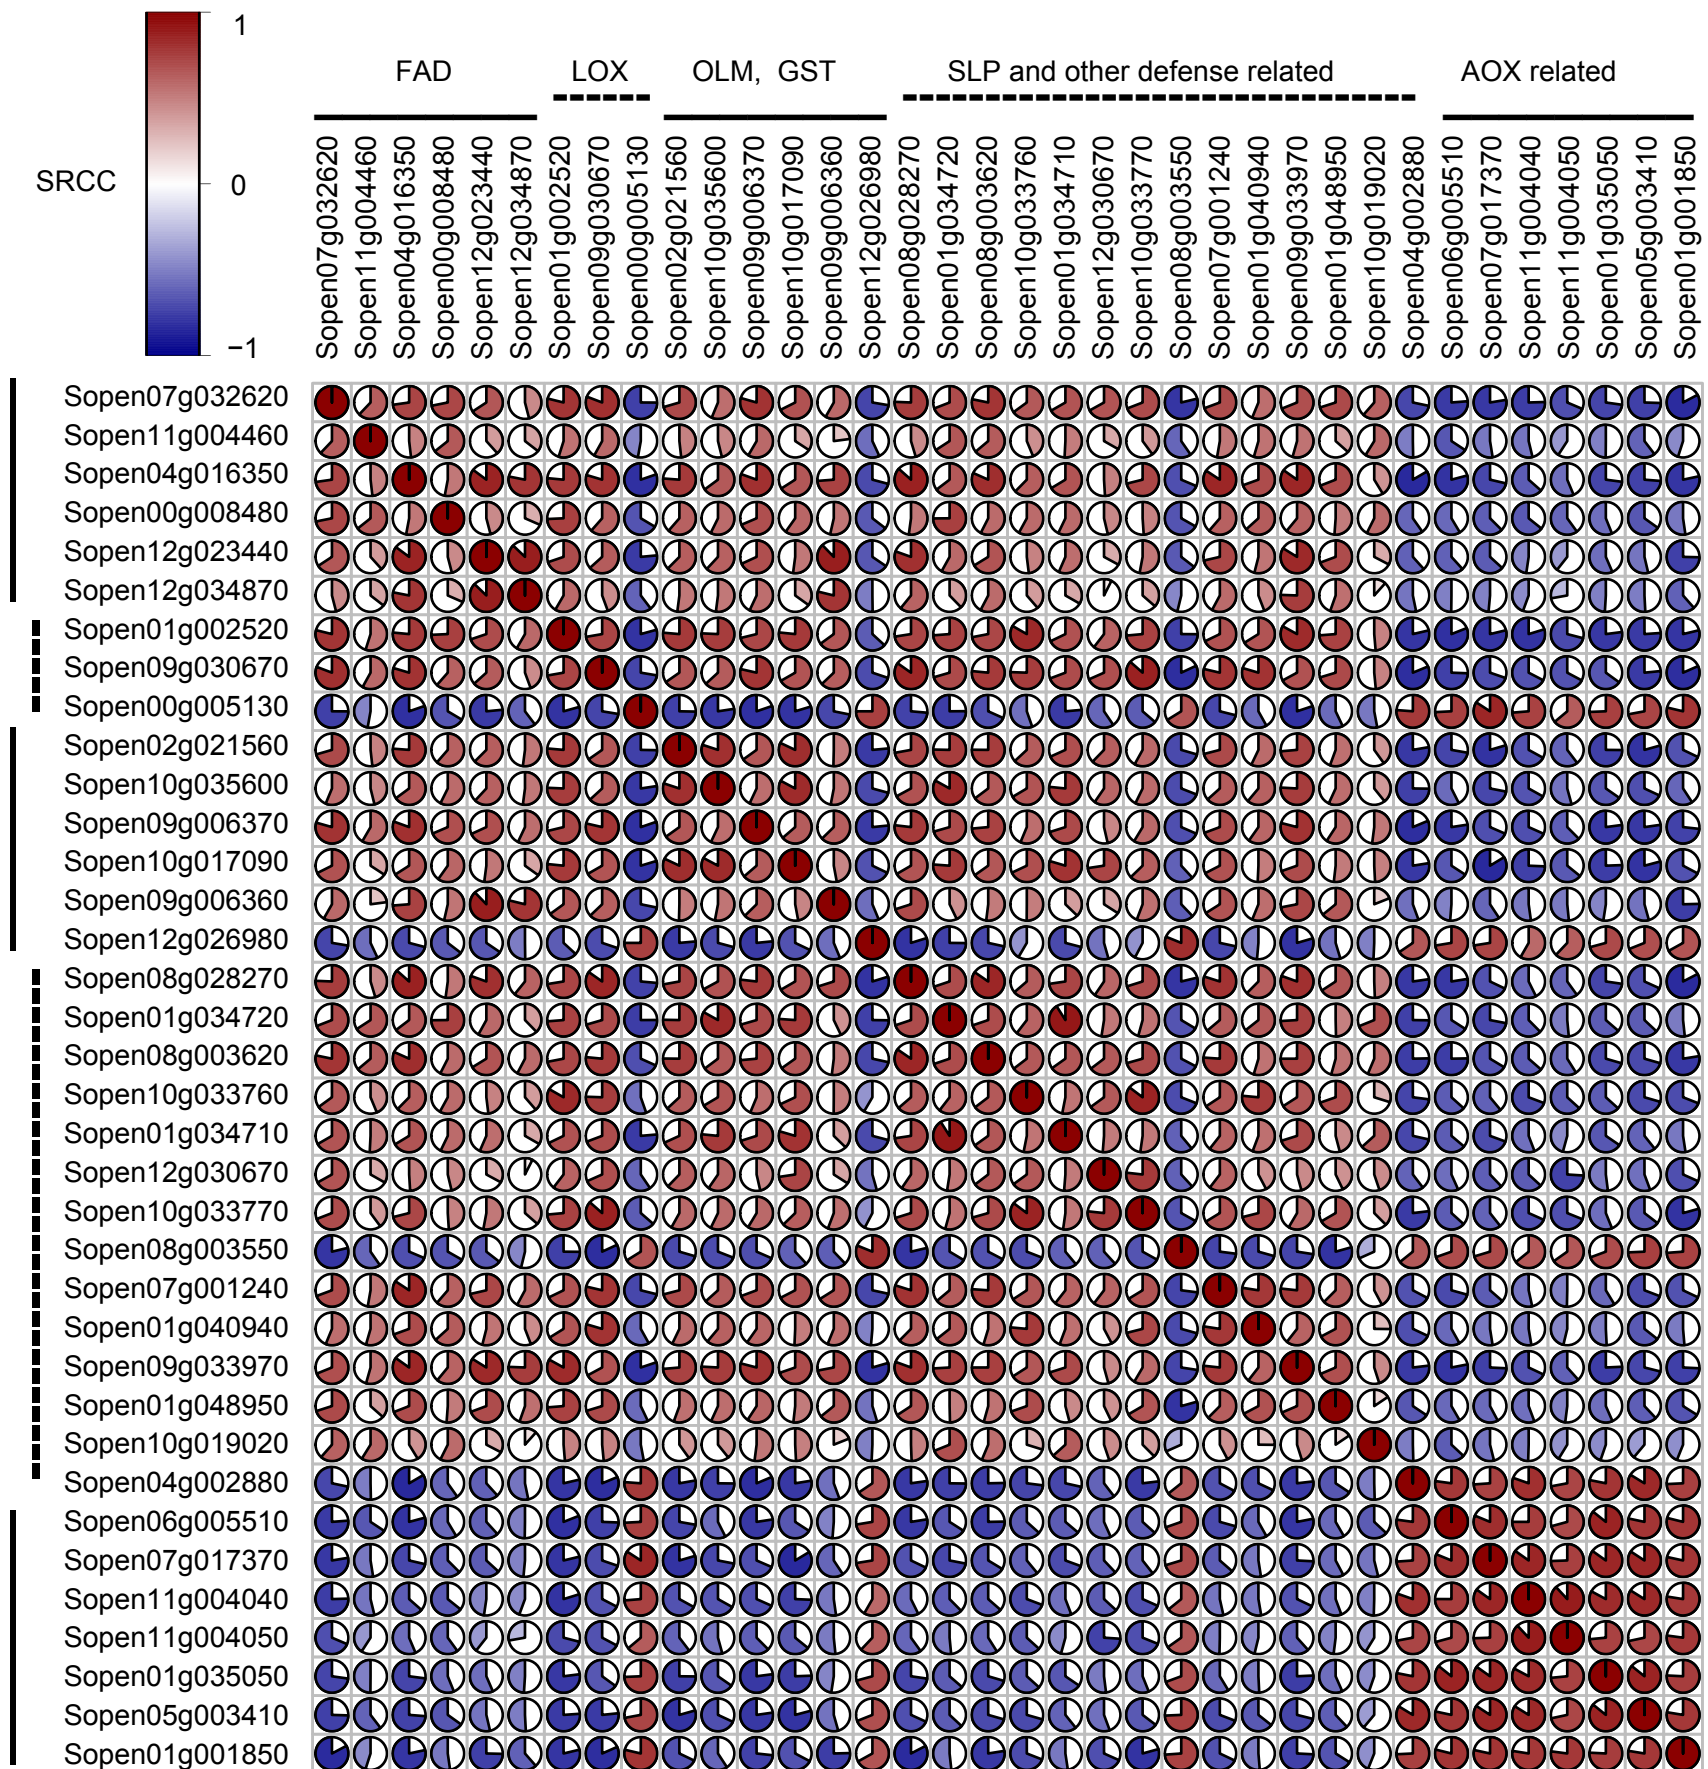

**Supplemental Figure 6. Correlation among expression profiles of putative defense genes.** Expression profiles (FPKM values) for each of 36 genes (from Table 4) in our 29 samples were used to determine pairwise Spearman's rank correlation coefficient (SRCC).

Abbreviations: FAD= fatty acid desaturase; LOX= lipoxygenase; OLM= oxylipin metabolism; GST= glutathione S-transferase; SLP= subtilisin-like protease; AOX= amine oxidase.

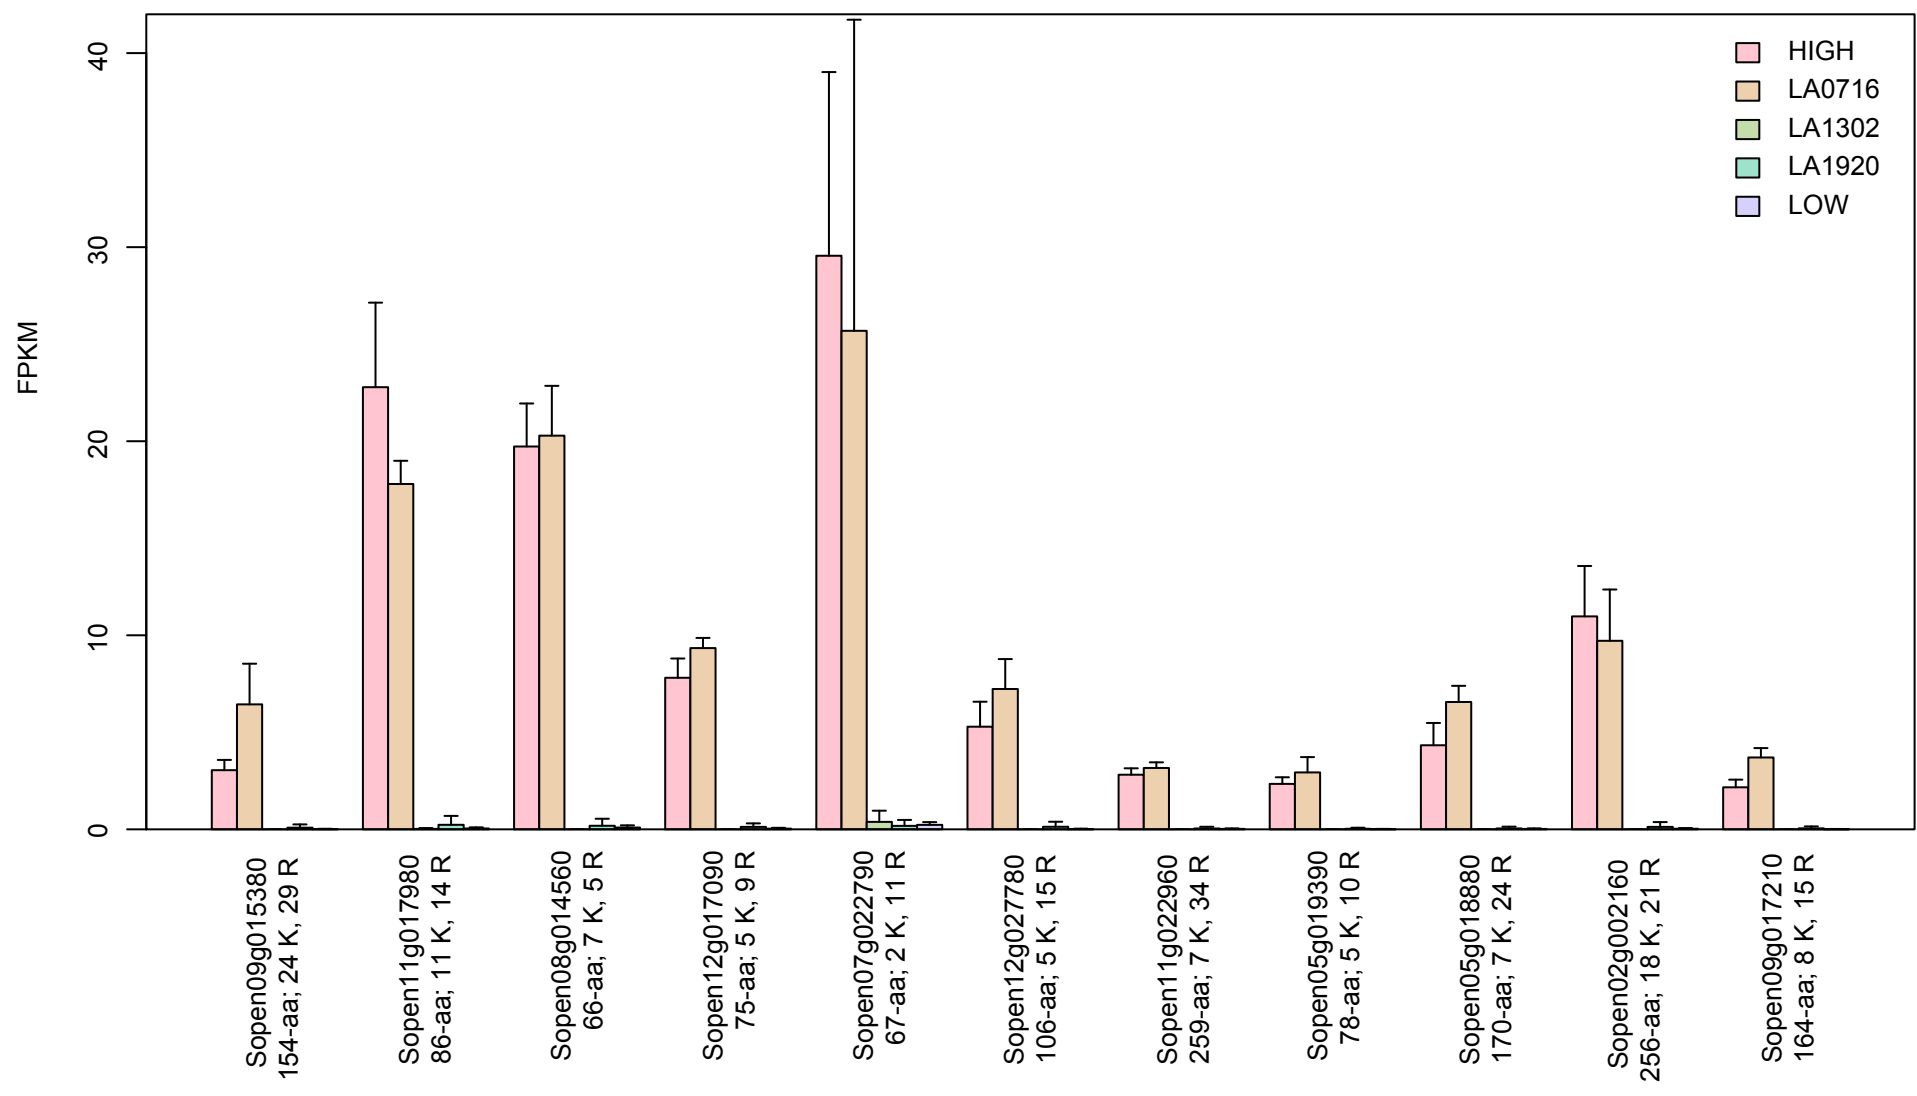

**Supplemental Figure 7. Lys and Arg content of selected proteins encoded by genes co-expressed with *Sopen11g004040* (FLOWERING LOCUS D; amine oxidase domain).** Gene expression levels are represented as fragments per kilobase of transcript per million mapped reads (FPKM).

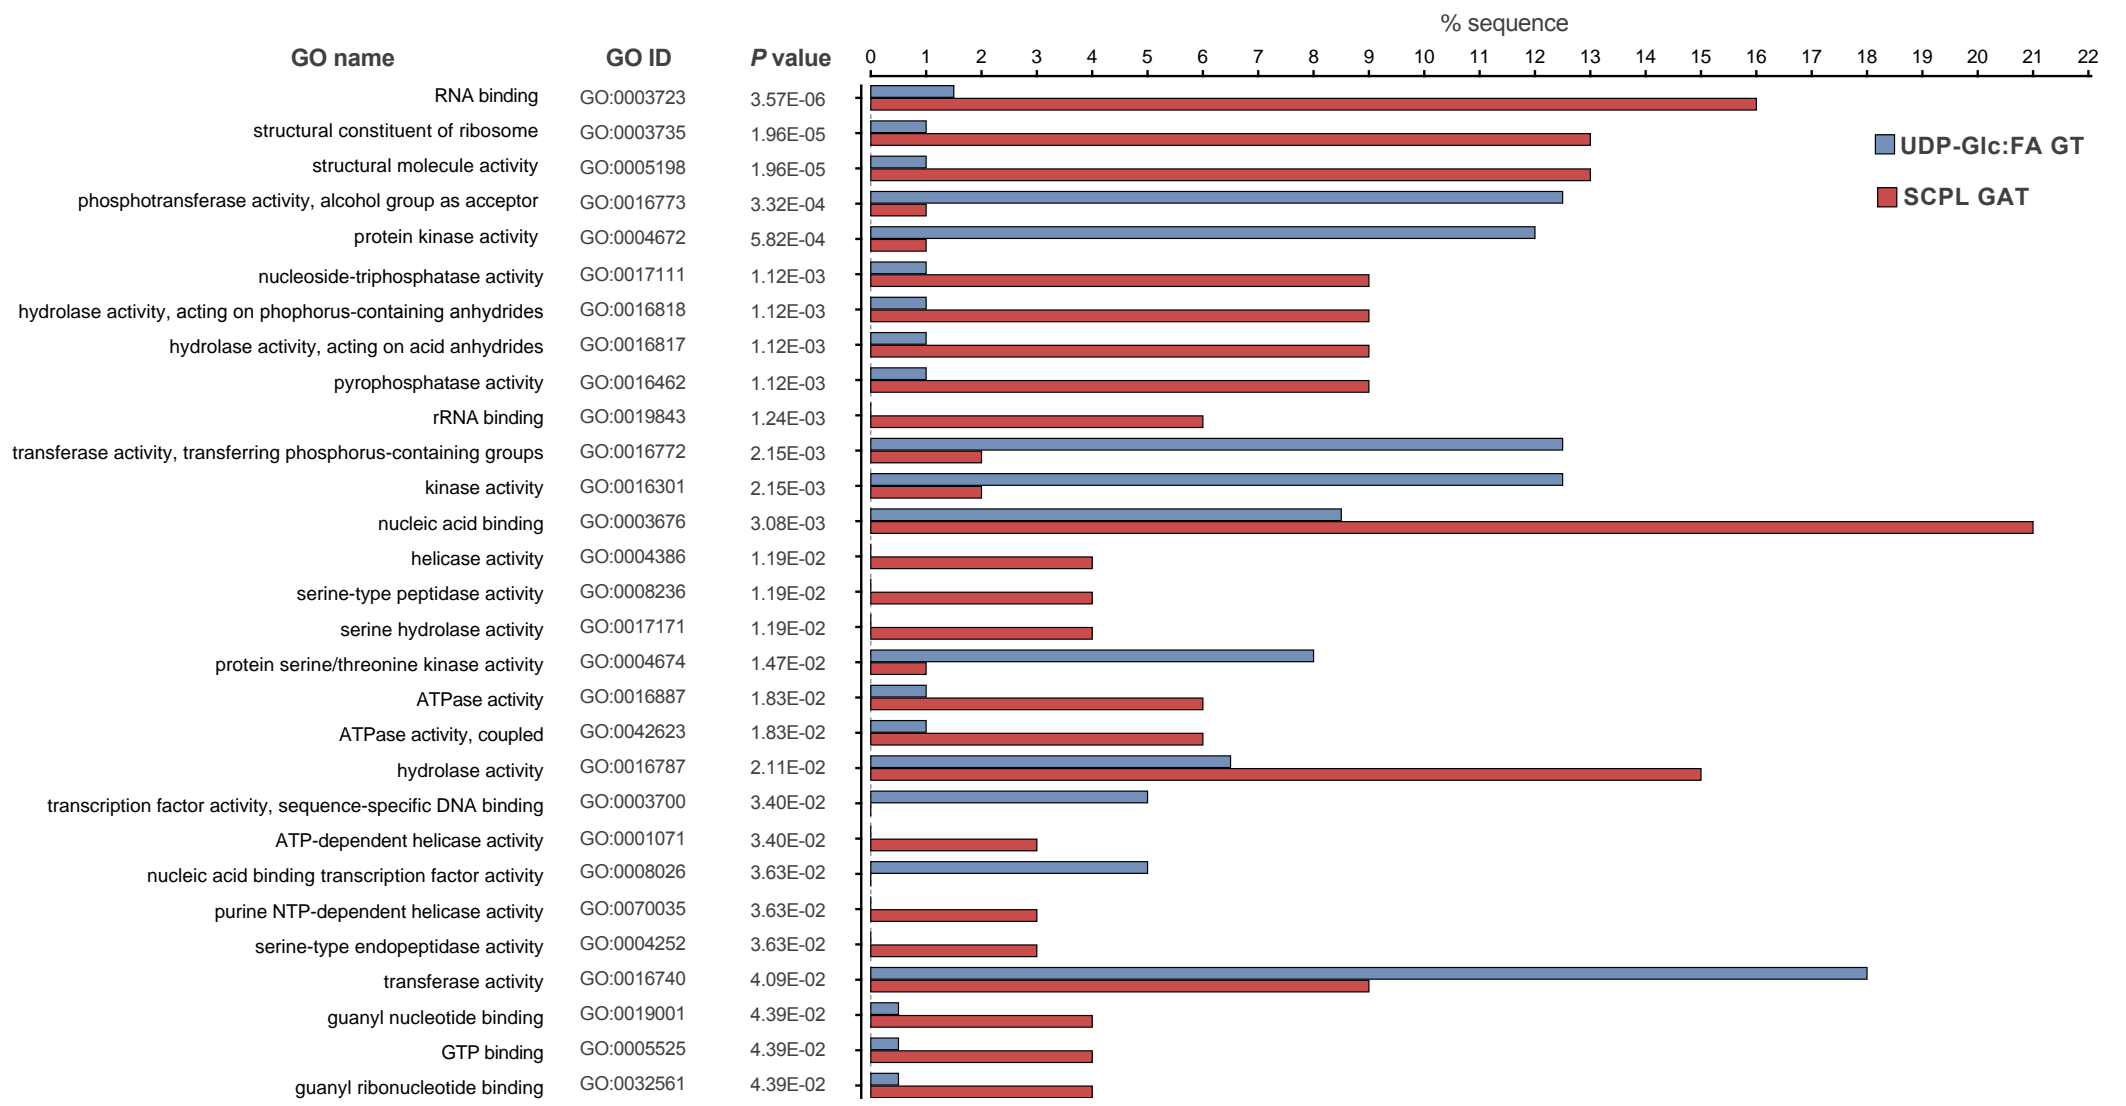

**Supplemental Figure 8. Full list of enriched gene ontology (GO) terms associated with genes strongly correlated with the UDP-Glc:FA GT and the SCPL GAT.**



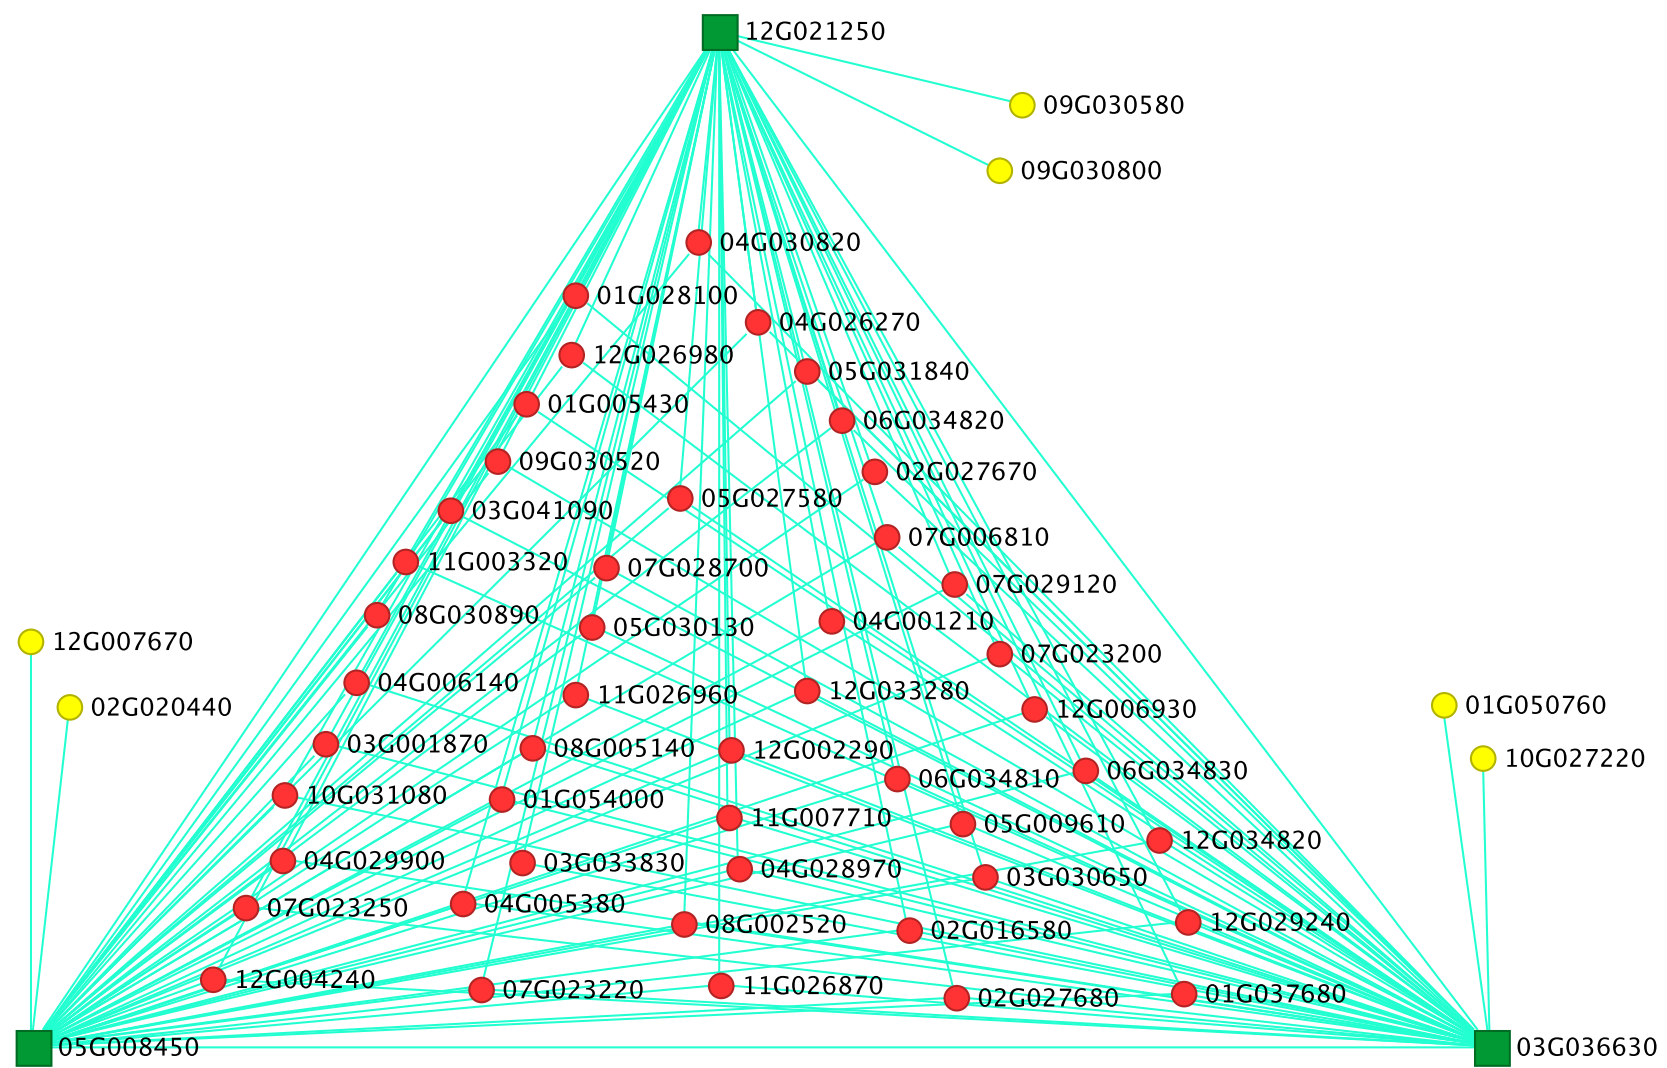

**Supplemental Figure 9. Top-50 most strongly connected genes for each of the three AP2-family transcription factor genes.** Intramodular connectivity strengths were determined by weighted gene correlation network analysis (WGCNA). Green squares represent AP2-family transcription factor genes. Red circles represent genes connected to all three AP2-family transcription factor genes. Yellow circles represent genes connected to only one of three AP2-family transcription factor genes.

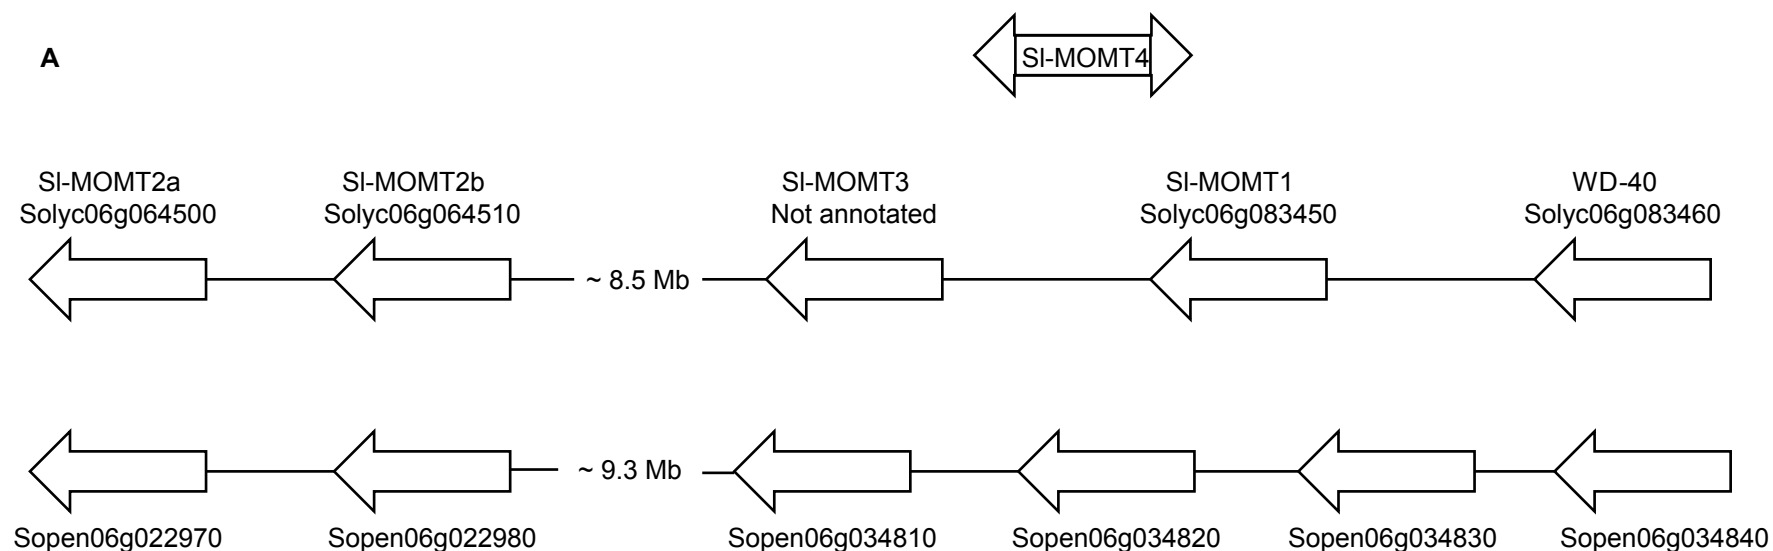

**B**

| Gene           | 'LOW' vs. 'HIGH'      |          | LA1920 vs. LA0716   |          | Imazapyr 0.1 mM     |          | Imazapyr 1 mM       |          | Annotation          |
|----------------|-----------------------|----------|---------------------|----------|---------------------|----------|---------------------|----------|---------------------|
|                | Log <sub>2</sub> FC   | FDR      | Log <sub>2</sub> FC | FDR      | Log <sub>2</sub> FC | FDR      | Log <sub>2</sub> FC | FDR      |                     |
| Sopen06g022970 | 1.10                  | 1.20E-01 | -1.63               | 1.20E-02 | -0.57               | 4.82E-01 | -2.70               | 6.63E-05 | O-methyltransferase |
| Sopen06g022980 | Low expression levels |          |                     |          | -1.61               | 9.31E-02 | -2.80               | 6.87E-04 | O-methyltransferase |
| Sopen06g034810 | 7.02                  | 5.70E-18 | 5.14                | 7.79E-15 | -1.61               | 1.27E-02 | -5.32               | 1.59E-14 | O-methyltransferase |
| Sopen06g034820 | 6.06                  | 1.23E-09 | 5.04                | 6.55E-09 | -1.72               | 5.07E-03 | -6.29               | 3.80E-18 | O-methyltransferase |
| Sopen06g034830 | 5.71                  | 1.91E-12 | 4.43                | 1.55E-05 | -2.58               | 4.54E-04 | -8.38               | 1.36E-15 | O-methyltransferase |
| Sopen06g034840 | 0.33                  | 1.47E-01 | 0.45                | 1.77E-01 | -0.25               | 4.73E-01 | 0.54                | 3.57E-02 | WD domain repeat    |

**Supplemental Figure 10. Selected O-methyltransferase genes on chromosome 6 involved in flavonoid metabolism in *S. pennellii* and *S. lycopersicum*.**

**(A)** Homologous regions in *S. lycopersicum* and *S. pennellii* containing MOMT (myricetin O-methyltransferase) genes. SI-MOMT4 is not present in *S. lycopersicum* Heinz 1706 reference genome; in M82 cultivar, SI-MOMT4 is located near SI-MOMT1, but not directly adjacent to SI-MOMT1 (Kim et al., 2014).

**(B)** Differential expression of O-methyltransferase genes in low- and high-acylsugar-producing accessions. Effect of imazapyr treatment on expression levels of these genes in accession LA0716 is also shown.

Abbreviations: FDR= false discovery rate; logFC= log<sub>2</sub>(fold-change).

| <b>Accession</b> | <b>% LDW</b> | <b>Std. Dev.</b> |
|------------------|--------------|------------------|
| LA1911           | 0.45         | 0.09             |
| LA1912           | 0.69         | 0.13             |
| LA1920           | 0.55         | 0.23             |
| LA1926           | 0.65         | 0.17             |
| LA1302           | 5.62         | 0.96             |
| LA1941           | 12.21        | 0.63             |
| LA1946           | 12.57        | 0.35             |
| LA0716           | 13.92        | 0.43             |

**Supplemental Table 1. Amount of total acylsugars produced by different accessions of *Solanum pennellii*.** Amounts are represented as mean percentage of leaf dry weight (% LDW) from 10-week-old plants (n=8).

| Biological group | Accession_replicate | Input reads (paired-end) | Left reads mapped | % Left reads mapped | Right reads mapped | % Right reads mapped | Aligned pairs | Multiple alignments | % Multiple alignments |
|------------------|---------------------|--------------------------|-------------------|---------------------|--------------------|----------------------|---------------|---------------------|-----------------------|
| LOW              | LA1911_1            | 28076632 x2              | 25670656          | 91.43               | 25460139           | 90.68                | 24479209      | 1402216             | 5.73                  |
| LOW              | LA1911_2            | 25897024 x2              | 23979058          | 92.59               | 23833753           | 92.03                | 22916745      | 1357221             | 5.92                  |
| LOW              | LA1911_3            | 23381377 x2              | 21606735          | 92.41               | 21468199           | 91.82                | 20477277      | 1280584             | 6.25                  |
| LOW              | LA1912_1            | 26513055 x2              | 24446188          | 92.20               | 24223469           | 91.36                | 23238773      | 1384616             | 5.96                  |
| LOW              | LA1912_2            | 27459168 x2              | 25464977          | 92.74               | 25350740           | 92.32                | 24300336      | 1532525             | 6.31                  |
| LOW              | LA1912_3            | 27197768 x2              | 25230181          | 92.77               | 25091449           | 92.26                | 24040708      | 1411414             | 5.87                  |
| LOW              | LA1926_1            | 24579536 x2              | 22652595          | 92.16               | 22408034           | 91.17                | 21458492      | 1302270             | 6.07                  |
| LOW              | LA1926_2            | 25068349 x2              | 23131746          | 92.27               | 22993018           | 91.72                | 22011845      | 1398082             | 6.35                  |
| LOW              | LA1926_3            | 24724627 x2              | 22833110          | 92.35               | 22734307           | 91.95                | 21738682      | 1205420             | 5.55                  |
| HIGH             | LA1941_1            | 12288246 x2              | 11502460          | 93.61               | 11432671           | 93.04                | 11179476      | 540316              | 4.83                  |
| HIGH             | LA1941_2            | 26080846 x2              | 24793307          | 95.06               | 24642137           | 94.48                | 23941692      | 1517300             | 6.34                  |
| HIGH             | LA1941_3            | 26040582 x2              | 24769968          | 95.12               | 24691874           | 94.82                | 23981049      | 1525979             | 6.36                  |
| HIGH             | LA1946_1            | 24173944 x2              | 22771758          | 94.20               | 22569746           | 93.36                | 21959695      | 1286378             | 5.86                  |
| HIGH             | LA1946_2            | 31780978 x2              | 30153635          | 94.88               | 29916301           | 94.13                | 29036842      | 2017167             | 6.95                  |
| HIGH             | LA1946_3            | 29730066 x2              | 28193764          | 94.83               | 28075357           | 94.43                | 27248926      | 1671475             | 6.13                  |
| HIGH             | LA0716_1            | 30522535 x2              | 29677629          | 97.23               | 29484523           | 96.60                | 29001962      | 1728181             | 5.96                  |
| HIGH             | LA0716_2            | 33592217 x2              | 32412058          | 96.49               | 32213141           | 95.89                | 31522686      | 2192129             | 6.95                  |
| HIGH             | LA0716_3            | 28833828 x2              | 28017182          | 97.17               | 27920559           | 96.83                | 27454445      | 1630720             | 5.94                  |
| MEDIUM           | LA1302_1            | 22253612 x2              | 20010595          | 89.92               | 19866310           | 89.27                | 19017544      | 1106004             | 5.82                  |
| MEDIUM           | LA1302_2            | 26994304 x2              | 24817574          | 91.94               | 24703973           | 91.52                | 23593535      | 1699083             | 7.20                  |
| MEDIUM           | LA1302_3            | 26601942 x2              | 24436183          | 91.86               | 24316523           | 91.41                | 23197918      | 1482818             | 6.39                  |
| LA1920           | LA1920_1            | 25852990 x2              | 23916352          | 92.51               | 23823834           | 92.15                | 22843819      | 2579519             | 11.29                 |
| LA1920           | LA1920_2            | 27558000 x2              | 25525014          | 92.62               | 25367999           | 92.05                | 24316564      | 1595845             | 6.56                  |
| LA1920           | LA1920_3            | 41277779 x2              | 38095756          | 92.29               | 38002335           | 92.06                | 36328058      | 2266688             | 6.24                  |
| LA1920           | LA1920_4            | 52957983 x2              | 48942356          | 92.42               | 48714958           | 91.99                | 46652941      | 2998256             | 6.43                  |
| LA0716           | LA0716_1            | 28097123 x2              | 27323686          | 97.25               | 27106013           | 96.47                | 26656972      | 1530910             | 5.74                  |
| LA0716           | LA0716_2            | 26072342 x2              | 24860684          | 95.35               | 24722176           | 94.82                | 24324913      | 1749564             | 7.19                  |
| LA0716           | LA0716_3            | 48846961 x2              | 47425319          | 97.09               | 47182276           | 96.59                | 46348049      | 2595647             | 5.60                  |
| LA0716           | LA0716_4            | 54976879 x2              | 53381600          | 97.10               | 53172897           | 96.72                | 52208391      | 3057741             | 5.86                  |

**Supplemental Table 2. Read-mapping (TopHat2 alignment) results with different accessions of *S. pennellii*.** TopHat2 was used for mapping reads to *S. pennellii* genome. Input reads indicate paired-end reads (x2) that passed quality-filtering process.

|                   |                       |                 | Sopen12g001230 |            |              |         | Sopen12g001240 |            |              |         |
|-------------------|-----------------------|-----------------|----------------|------------|--------------|---------|----------------|------------|--------------|---------|
| GenBank accession | Cuphea species        | Enzyme (length) | % Coverage     | % Identity | % Similarity | E-value | % Coverage     | % Identity | % Similarity | E-value |
| AF060518          | <i>C. pulcherrima</i> | KAS IV (545-aa) | 12             | 24         | 43           | 1.0     | 82             | 83         | 92           | 0.0     |
| AF060519          | <i>C. hookeriana</i>  | KAS IV (533-aa) | 3              | 50         | 80           | 0.3     | 90             | 77         | 87           | 0.0     |
| U67317            | <i>C. wrightii</i>    | KAS II (540-aa) | 13             | 47         | 58           | 4.1     | 86             | 82         | 90           | 0.0     |
| U67316            | <i>C. wrightii</i>    | KAS II (517-aa) | 11             | 22         | 43           | 3.0     | 85             | 82         | 90           | 0.0     |
| AJ344250          | <i>C. lanceolata</i>  | KAS IV (538-aa) | 7              | 36         | 54           | 4.7     | 83             | 81         | 89           | 0.0     |

**Supplemental Table 3. Sequence similarity between *Cuphea* KAS IV/ KAS II-like enzymes and Sopen12g004230-Sopen12g004240.** Amino acid sequences of KAV IV/KAS II-like enzymes from five *Cuphea* species were obtained, and BLASTp was used for determining sequence similarity.

| Gene           | Annotation / domain                                        | Module    | GS_FLD | P_GS_FLD  |
|----------------|------------------------------------------------------------|-----------|--------|-----------|
| Sopen11g004040 | Flowering locus D (flavin containing amine oxidoreductase) | turquoise | 1.000  | 8.38E-209 |
| Sopen11g004050 | Flowering locus D (flavin containing amine oxidoreductase) | turquoise | 0.881  | 2.93E-10  |
| Sopen05g003400 | F-box associated                                           | turquoise | 0.930  | 2.89E-13  |
| Sopen01g020690 | Leucine rich repeat                                        | turquoise | 0.908  | 1.12E-11  |
| Sopen02g027300 | PDZ domain                                                 | turquoise | 0.898  | 3.87E-11  |
| Sopen12g009260 | Exostosin family                                           | turquoise | 0.895  | 5.90E-11  |
| Sopen05g008030 | Protein tyrosine kinase                                    | turquoise | 0.890  | 1.03E-10  |
| Sopen08g003240 | Myb-like DNA-binding domain                                | turquoise | 0.877  | 4.49E-10  |
| Sopen11g004020 | F-box domain                                               | turquoise | 0.868  | 1.04E-09  |
| Sopen09g023850 | hAT family C-terminal dimerization region                  | turquoise | 0.866  | 1.33E-09  |
| Sopen11g019590 | BED zinc finger                                            | turquoise | 0.863  | 1.67E-09  |
| Sopen08g014860 | NB-ARC domain                                              | turquoise | 0.849  | 5.99E-09  |
| Sopen07g017370 | Copper amine oxidase, enzyme domain                        | turquoise | 0.849  | 6.10E-09  |
| Sopen01g037050 | WD domain, G-beta repeat                                   | turquoise | 0.841  | 1.15E-08  |
| Sopen05g003410 | Extensin-like                                              | turquoise | 0.838  | 1.36E-08  |
| Sopen08g003250 | Exostosin family                                           | turquoise | 0.830  | 2.50E-08  |
| Sopen01g035050 | Molybdopterin-binding domain of aldehyde dehydrogenase     | turquoise | 0.828  | 2.91E-08  |
| Sopen03g012060 | Protein of unknown function (DUF3754)                      | turquoise | 0.825  | 3.79E-08  |
| Sopen03g021480 | Ras family                                                 | turquoise | 0.823  | 4.29E-08  |

**Supplemental Table 4. Selected genes strongly correlated with *Sopen11g004040* (FLOWERING LOCUS D; amine oxidase domain).** GS\_FLD indicates gene significance (GS) of a gene with expression profile of *Sopen11g004040*. P\_GS\_FLD indicates *P* value associated with GS\_FLD.

| Gene                                | Annotation / domain                     | Module color | GS    | P value  |
|-------------------------------------|-----------------------------------------|--------------|-------|----------|
| <b>Signal recognition particles</b> |                                         |              |       |          |
| Sopen01g037350                      | SRP54-type protein, GTPase domain       | green        | 0.761 | 1.64E-06 |
| Sopen09g004690                      | SRP54-type protein, GTPase domain       | green        | 0.757 | 1.99E-06 |
| <b>RNA binding domain</b>           |                                         |              |       |          |
| Sopen11g003080                      | RNA recognition motif                   | green        | 0.757 | 1.99E-06 |
| Sopen09g005950                      | RNA recognition motif                   | green        | 0.755 | 2.20E-06 |
| Sopen09g002690                      | RNA recognition motif                   | green        | 0.737 | 5.02E-06 |
| <b>Ribosomal proteins</b>           |                                         |              |       |          |
| Sopen01g023660                      | Ribosomal protein S6                    | green        | 0.832 | 2.22E-08 |
| Sopen02g022830                      | Ribosomal protein S5, C-terminal domain | green        | 0.802 | 1.64E-07 |
| Sopen04g033370                      | Ribosomal protein S9/S16                | green        | 0.802 | 1.69E-07 |
| Sopen02g017200                      | Ribosomal protein S21                   | green        | 0.739 | 4.70E-06 |
| Sopen07g030180                      | Ribosomal protein L4/L1 family          | green        | 0.755 | 2.25E-06 |
| Sopen01g025250                      | Ribosomal protein L34                   | green        | 0.744 | 3.75E-06 |
| Sopen06g017110                      | Ribosomal protein L3                    | green        | 0.753 | 2.41E-06 |
| Sopen08g026520                      | Ribosomal protein L19                   | green        | 0.772 | 9.16E-07 |
| Sopen05g005170                      | Ribosomal protein L18e/L15              | green        | 0.746 | 3.43E-06 |
| Sopen06g034110                      | Ribosomal protein L17                   | green        | 0.733 | 6.12E-06 |
| Sopen09g033320                      | Ribosomal L28 family                    | green        | 0.73  | 7.11E-06 |
| <b>Translation process related</b>  |                                         |              |       |          |
| Sopen12g033130                      | Translation initiation factor 1A / IF-1 | green        | 0.778 | 6.85E-07 |
| Sopen06g028080                      | Elongation factor Tu GTP binding domain | green        | 0.814 | 7.95E-08 |
| Sopen07g007510                      | Elongation factor TS                    | green        | 0.741 | 4.30E-06 |
| Sopen02g022200                      | 50S ribosome-binding GTPase             | green        | 0.755 | 2.20E-06 |
| Sopen05g033080                      | tRNA synthetases class I (M)            | green        | 0.764 | 1.45E-06 |
| Sopen08g006220                      | Putative tRNA binding domain            | green        | 0.843 | 9.65E-09 |
| Sopen01g035990                      | Glycyl-tRNA synthetase beta subunit     | green        | 0.751 | 2.72E-06 |

**Supplemental Table 5. Selected genes in WGCNA 'green' module showing strong correlation with the SCPL GAT. GS indicates gene significance.**

| Gene                                                        | Annotation / domain                               | Module color | GS     | P val  |
|-------------------------------------------------------------|---------------------------------------------------|--------------|--------|--------|
| <b>Ten selected housekeeping genes</b>                      |                                                   |              |        |        |
| Sopen11g001340                                              | Actin                                             | yellow       | -0.251 | 0.1895 |
| Sopen12g030180                                              | Tubulin/FtsZ family, GTPase domain                | greenyellow  | 0.036  | 0.8531 |
| Sopen10g001540                                              | Ubiquitin family                                  | green        | 0.471  | 0.0098 |
| Sopen02g025800                                              | Phosphofructokinase                               | cyan         | 0.321  | 0.0899 |
| Sopen03g030190                                              | Glyceraldehyde 3-phosphate dehydrogenase          | purple       | -0.129 | 0.5046 |
| Sopen05g004290                                              | ATP synthase alpha/beta family                    | cyan         | 0.369  | 0.0489 |
| Sopen01g017150                                              | TATA-binding protein, TBP (TFIID)                 | grey         | -0.06  | 0.7587 |
| Sopen08g018310                                              | DEAD/DEAH box helicase                            | yellow       | -0.104 | 0.5916 |
| Sopen06g026310                                              | Elongation factor Tu GTP binding domain           | brown        | -0.047 | 0.8095 |
| Sopen08g024350                                              | Ribosomal protein L13e                            | cyan         | 0.312  | 0.0991 |
| <b>Signal recognition particles</b>                         |                                                   |              |        |        |
| Sopen06g018440                                              | Signal recognition particle 14kD protein          | pink         | 0.223  | 0.2446 |
| Sopen12g034450                                              | Signal recognition particle 9 kDa protein         | pink         | 0.203  | 0.291  |
| Sopen03g031530                                              | Signal recognition particle receptor beta subunit | brown        | -0.053 | 0.786  |
| Sopen11g019580                                              | Signal recognition particle receptor beta subunit | pink         | -0.061 | 0.7529 |
| Sopen12g004860                                              | Signal recognition particle, alpha subunit        | brown        | -0.466 | 0.0108 |
| Sopen08g030970                                              | SRP19 protein                                     | pink         | 0.326  | 0.0848 |
| Sopen07g004220                                              | SRP40, C-terminal domain                          | pink         | 0.412  | 0.0264 |
| Sopen03g035740                                              | SRP54-type protein, GTPase domain                 | black        | -0.003 | 0.9858 |
| Sopen12g021920                                              | SRP54-type protein, GTPase domain                 | brown        | -0.461 | 0.0118 |
| Sopen11g024250                                              | SRP72 RNA-binding domain                          | turquoise    | 0.097  | 0.6165 |
| <b>Translation initiation factors and elongation actors</b> |                                                   |              |        |        |
| Sopen05g028630                                              | Translation initiation factor 1A / IF-1           | grey         | 0.47   | 0.0101 |
| Sopen05g030710                                              | Translation initiation factor 1A / IF-1           | pink         | 0.185  | 0.3361 |
| Sopen03g025590                                              | Translation initiation factor 1A / IF-1           | turquoise    | -0.014 | 0.9434 |
| Sopen12g034140                                              | Elongation factor Tu GTP binding domain           | cyan         | -0.074 | 0.7033 |
| Sopen03g015600                                              | Elongation factor Tu GTP binding domain           | blue         | -0.062 | 0.7491 |
| Sopen01g028310                                              | Elongation factor Tu GTP binding domain           | turquoise    | 0.044  | 0.8213 |
| Sopen06g001040                                              | Elongation factor Tu GTP binding domain           | cyan         | -0.015 | 0.9373 |
| Sopen12g006600                                              | Elongation factor TS                              | pink         | 0.22   | 0.2511 |
| <b>Ribosomal protein S6 family</b>                          |                                                   |              |        |        |
| Sopen08g030910                                              | Ribosomal protein S6                              | green        | 0.647  | 0.0001 |
| Sopen05g033450                                              | Ribosomal protein S6                              | cyan         | 0.39   | 0.0364 |
| Sopen02g029090                                              | Ribosomal protein S6                              | turquoise    | -0.073 | 0.707  |
| Sopen08g022890                                              | Ribosomal protein S6e                             | cyan         | 0.497  | 0.0061 |
| Sopen12g032160                                              | Ribosomal protein S6e                             | cyan         | 0.298  | 0.1164 |
| <b>Ribosomal protein S5 family</b>                          |                                                   |              |        |        |
| Sopen11g004490                                              | Ribosomal protein S5, C-terminal domain           | blue         | 0.316  | 0.095  |
| Sopen04g029430                                              | Ribosomal protein S5, N-terminal domain           | cyan         | 0.421  | 0.023  |



|                                        |                                         |         |       |       |
|----------------------------------------|-----------------------------------------|---------|-------|-------|
| Sopen04g026210                         | Ribosomal protein S5, N-terminal domain | cyan    | 0.258 | 0.177 |
| <b>Ribosomal protein S9/S16 family</b> |                                         |         |       |       |
| Sopen01g030490                         | Ribosomal protein S9/S16                | cyan    | 0.349 | 0.064 |
| Sopen04g014030                         | Ribosomal protein S9/S16                | cyan    | 0.325 | 0.086 |
| Sopen05g001690                         | Ribosomal protein S9/S16                | cyan    | 0.209 | 0.276 |
| Sopen10g030770                         | Ribosomal protein S9/S16                | magenta | 0.183 | 0.341 |

**Supplemental Table 6. Selected housekeeping genes and translation-related genes showing correlations in gene expression profiles (GS) with the SCPL GAT. GS indicates gene significance.**

| Gene                                                                            | Imazapyr 0.1 mM     |          | Imazapyr 1 mM       |          | Annotation / domain                     |
|---------------------------------------------------------------------------------|---------------------|----------|---------------------|----------|-----------------------------------------|
|                                                                                 | Log <sub>2</sub> FC | FDR      | Log <sub>2</sub> FC | FDR      |                                         |
| Sopen02g020400                                                                  | 1.078               | 0.006991 | 4.217               | 4.38E-33 | ABC transporter B family                |
| Sopen03g003490                                                                  | 1.151               | 0.00018  | 1.901               | 7.16E-12 | ABC transporter C family member 10-like |
| Sopen06g025860                                                                  | 1.024               | 0.002743 | 1.656               | 3.81E-08 | ABC transporter I family                |
| Sopen08g031080                                                                  | 0.421               | 0.226405 | 1.459               | 7.11E-08 | ABC transporter F family                |
| Sopen04g024980                                                                  | 0.245               | 0.506156 | 1.346               | 1.79E-07 | ABC transporter D family                |
| Sopen01g044530                                                                  | 1.200               | 0.185844 | 3.320               | 1.88E-07 | pleiotropic drug resistance protein     |
| Sopen06g017680                                                                  | -0.301              | 0.383764 | 1.259               | 4.36E-07 | putative ABC1 protein At2g40090         |
| Sopen09g017780                                                                  | 0.470               | 0.126481 | 1.226               | 6.28E-07 | ABC transporter B family                |
| Sopen01g043640                                                                  | 0.459               | 0.137201 | 1.189               | 1.33E-06 | ABC transporter F family                |
| Sopen06g012460                                                                  | -0.476              | 0.187344 | 1.182               | 1.69E-05 | ABC transporter C family                |
| Sopen06g031340                                                                  | -0.063              | 0.89446  | 1.079               | 5.21E-05 | ABC transporter F family                |
| Sopen11g027810                                                                  | 0.279               | 0.520061 | 1.222               | 6.96E-05 | ABC transporter F family                |
| Sopen08g023990                                                                  | 0.260               | 0.656472 | 1.267               | 0.001124 | ABC transporter E family                |
| Sopen11g026980                                                                  | 0.007               | 1        | 1.900               | 0.002469 | ABC transporter B family                |
| Sopen01g047950                                                                  | 0.390               | 0.551545 | 1.265               | 0.006381 | ABC transporter G family                |
| <b>DEGs with higher expression levels in low-acylsugar-producing accessions</b> |                     |          |                     |          |                                         |
| Sopen04g023150                                                                  | -0.014              | 0.987791 | -0.243              | 0.511372 | ABC transporter F family                |
| Sopen01g047950                                                                  | 0.390               | 0.551545 | 1.265               | 0.006381 | ABC transporter G family                |

**Supplemental Table 7. Effect of imazapyr treatment on expression levels of ABC transporter genes in LA0716.** FC and FDR indicate fold-change and false discovery rate, respectively. DEGs= differentially expressed genes.

| Gene           | Annotation / domain                                       | Imazapyr 0.1 mM                 |       | Imazapyr 1 mM                   |          |
|----------------|-----------------------------------------------------------|---------------------------------|-------|---------------------------------|----------|
|                |                                                           | Log <sub>2</sub> F <sub>C</sub> | FDR   | Log <sub>2</sub> F <sub>C</sub> | FDR      |
| Sopen11g004040 | Flowering locus D (favin containing amine oxidoreductase) | -0.256                          | 0.647 | 0.235                           | 0.581    |
| Sopen11g004050 | Flowering locus D (favin containing amine oxidoreductase) | -0.309                          | 0.566 | 0.365                           | 0.365    |
| Sopen05g003400 | F-box associated                                          | 0.726                           | 0.134 | 0.582                           | 0.159    |
| Sopen01g020690 | Leucine rich repeat                                       | 0.587                           | 0.269 | 0.637                           | 0.139    |
| Sopen02g027300 | PDZ domain                                                | 0.088                           | 0.859 | 0.979                           | 5.62E-05 |
| Sopen12g009260 | Exostosin family                                          | -1.288                          | 0.035 | 0.136                           | 0.824    |
| Sopen05g008030 | Protein tyrosine kinase                                   | 0.199                           | 0.665 | 1.390                           | 3.12E-06 |
| Sopen08g003240 | Myb-like DNA-binding domain                               | -0.538                          | 0.164 | -0.352                          | 0.292    |
| Sopen11g004020 | F-box domain                                              | -0.039                          | 0.956 | -0.228                          | 0.538    |
| Sopen09g023850 | hAT family C-terminal dimerisation region                 | 0.034                           | 0.976 | -0.270                          | 0.539    |
| Sopen11g019590 | BED zinc finger                                           | 0.604                           | 0.295 | -0.315                          | 0.535    |
| Sopen08g014860 | NB-ARC domain                                             | -0.117                          | 0.873 | 0.149                           | 0.758    |
| Sopen07g017370 | Copper amine oxidase, enzyme domain                       | 0.314                           | 0.405 | 1.204                           | 1.01E-05 |
| Sopen01g037050 | WD domain, G-beta repeat                                  | 0.376                           | 0.253 | 0.491                           | 0.063    |
| Sopen05g003410 | Extensin-like                                             | 0.543                           | 0.072 | 0.220                           | 0.426    |
| Sopen08g003250 | Exostosin family                                          | 0.642                           | 0.032 | 0.803                           | 0.002    |
| Sopen01g035050 | Molybdopterin-binding domain of aldehyde dehydrogenase    | -0.197                          | 0.671 | -0.041                          | 0.917    |
| Sopen03g012060 | Protein of unknown function (DUF3754)                     | -0.018                          | 0.981 | 0.724                           | 0.016    |
| Sopen03g021480 | Ras family                                                | 0.202                           | 0.656 | -0.029                          | 0.942    |

**Supplemental Table 8. Effect of imazapyr treatment on expression levels of selected genes strongly correlated with FLOWERING LOCUS D gene *Sopen11g004040* (Supplemental Table 4 genes). FC and FDR indicate fold-change and false discovery rate, respectively.**
